# Supplementary material for: Isolated Fe-Co heteronuclear diatomic sites as efficient bifunctional catalysts for high-performance lithium-sulfur batteries
Source: PubMed Central journal article supplement (PMC9849388; doi:10.1038/s41467-022-35736-x), 2023-01-18
Supplement: 41467_2022_35736_MOESM1_ESM.pdf [file 41467_2022_35736_MOESM1_ESM.pdf]

## Supplementary Information

Isolated Fe-Co heteronuclear diatomic sites as efficient bifunctional catalysts for high-performance lithium-sulfur batteries

Xun Sun <sup>a</sup>, Yue Qiu <sup>a</sup>, Bo Jiang <sup>a</sup>, Zhaoyu Chen <sup>b</sup>, Chenghao Zhao <sup>a</sup>, Hao Zhou <sup>a</sup>, Li Yang <sup>a</sup>, Lishuang Fan <sup>a</sup>, Yu Zhang <sup>\*c</sup>, Naiqing Zhang <sup>\*a</sup>

<sup>a</sup> State Key Laboratory of Urban Water Resource and Environment, School of Chemistry and Chemical Engineering, Harbin Institute of Technology, Harbin, 150001, China.

<sup>b</sup> Space Environment Simulation Research Infrastructure, Harbin Institute of Technology Harbin 150006, China

<sup>c</sup> School of Energy Science and Engineering, Harbin Institute of Technology, Harbin, 150001, China.

\*Corresponding Author

Naiqing Zhang ([zhangnq@hit.edu.cn](mailto:zhangnq@hit.edu.cn))

Yu Zhang ([zhangchemistry@hit.edu.cn](mailto:zhangchemistry@hit.edu.cn))

School of Chemistry and Chemical Engineering, Harbin Institute of Technology, Harbin, China

Tel: +451 86412153

Fax: +86-451-86412153

### Table of contents:

Supplementary Figures 1-23

Supplementary Tables 1-5

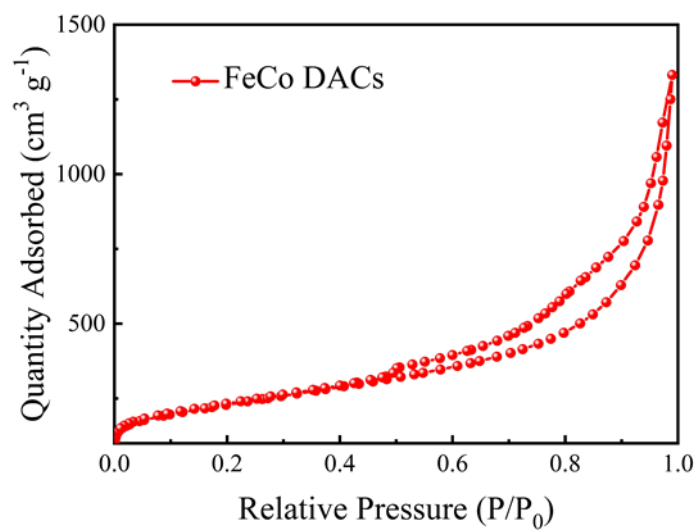

**Supplementary Fig. 1** N<sub>2</sub> isothermal adsorption-desorption curves of FeCo DACs.

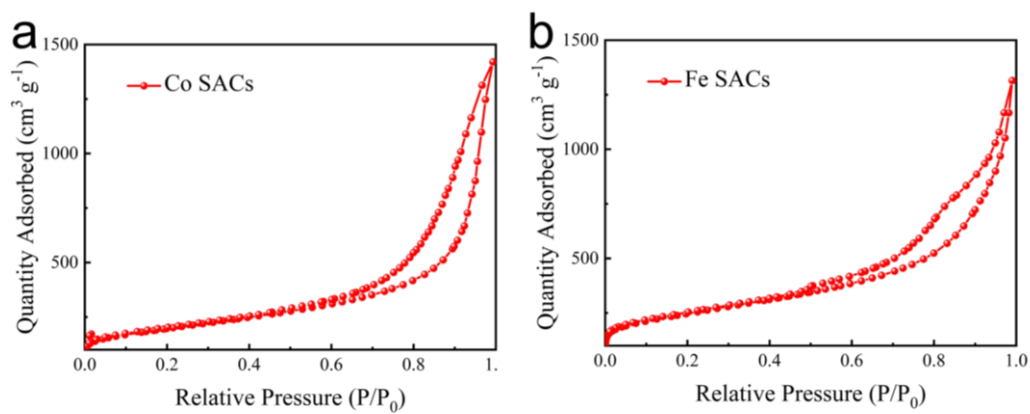

**Supplementary Fig. 2** N<sub>2</sub> isothermal adsorption-desorption curves of (a) Co SACs, (b) Fe SACs.

The specific surface areas of Co SACs and Fe SACs are 828.9 and 812.4, respectively.

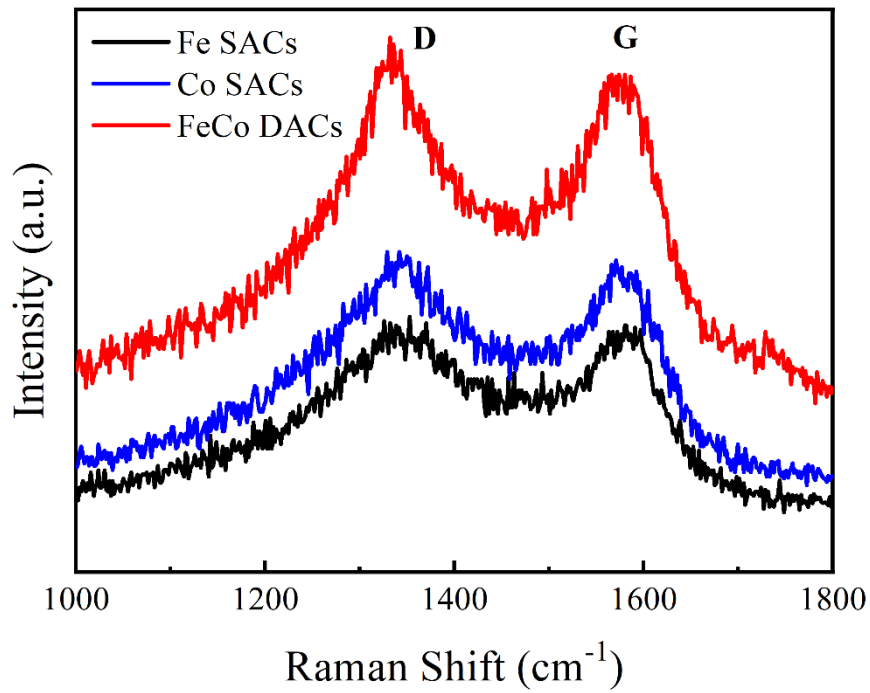

**Supplementary Fig. 3** Raman spectra of FeCo DACs, Co SACs and Fe SACs.

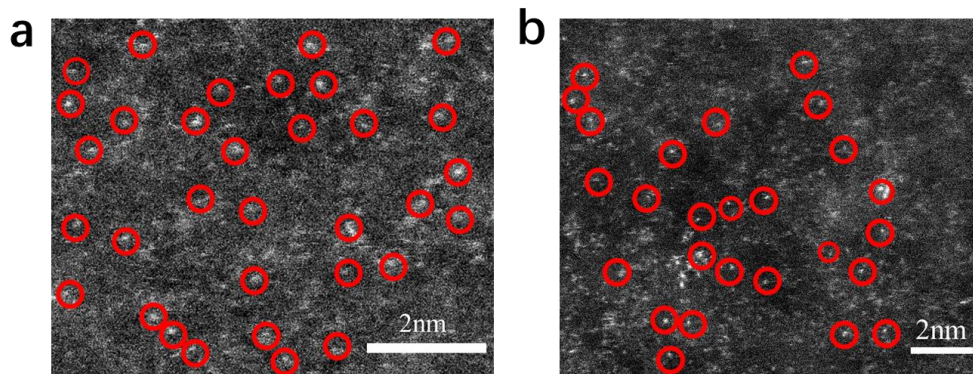

**Supplementary Fig. 4** Aberration-corrected HAADF-STEM image of (a) Co SACs and (b) Fe SACs.

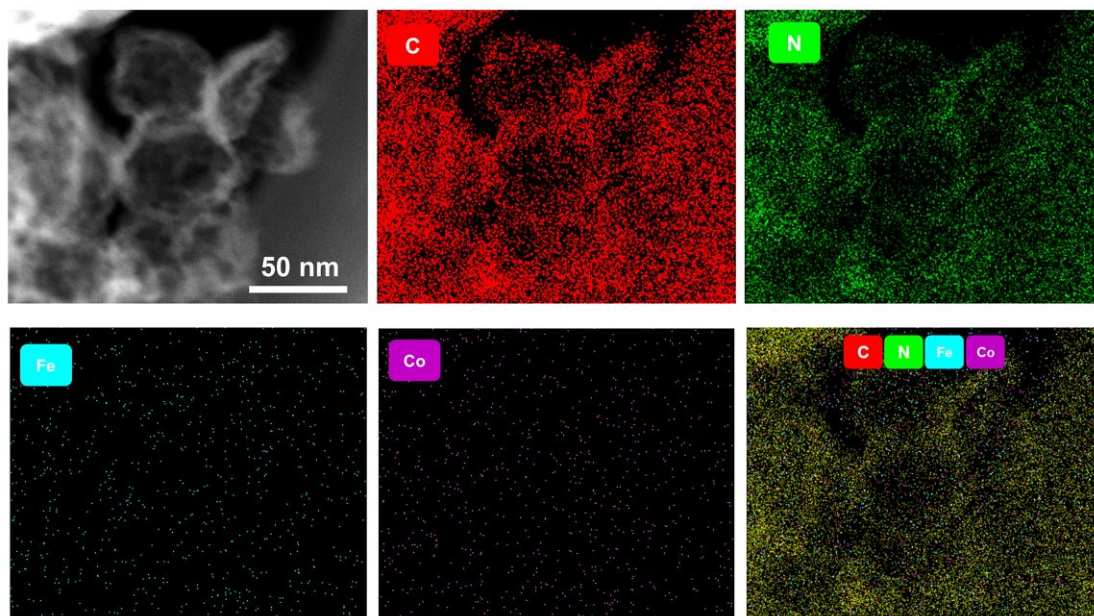

**Supplementary Fig. 5** The elemental mapping images of FeCo DACs.

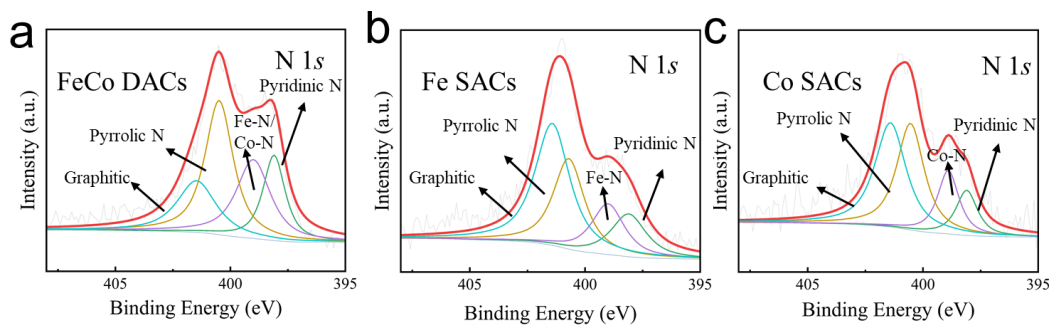

**Supplementary Fig. 6** High-resolution N 1s XPS spectra of the (a) FeCo DACs, (b) Fe SACs and (c) Co SACs .

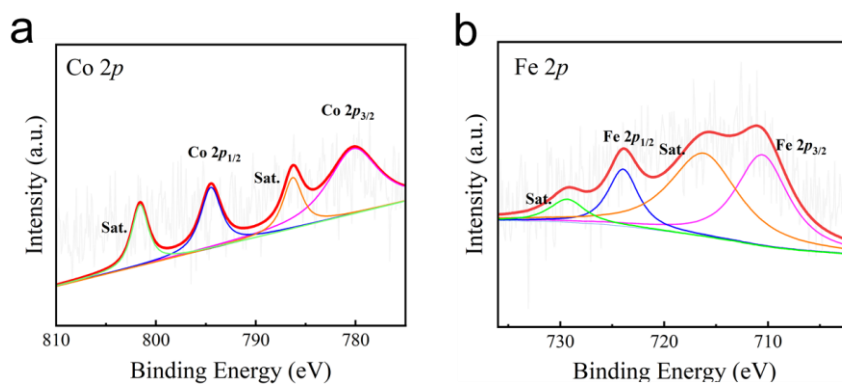

**Supplementary Fig. 7** XPS spectra of the FeCo DACs (a) Co 2p (b) Fe 2p.

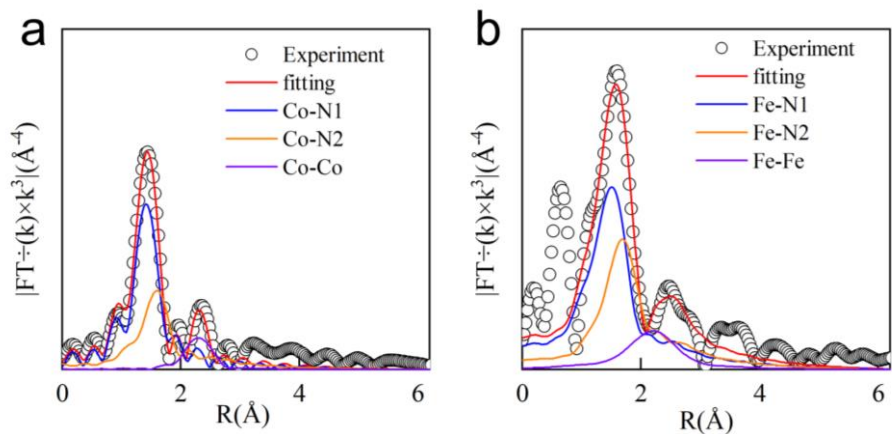

**Supplementary Fig. 8** (a) The Co K-edge (b) Fe K-edge EXAFS fitting curves of Fe-Co DACs with Co-Co and Fe-Fe.

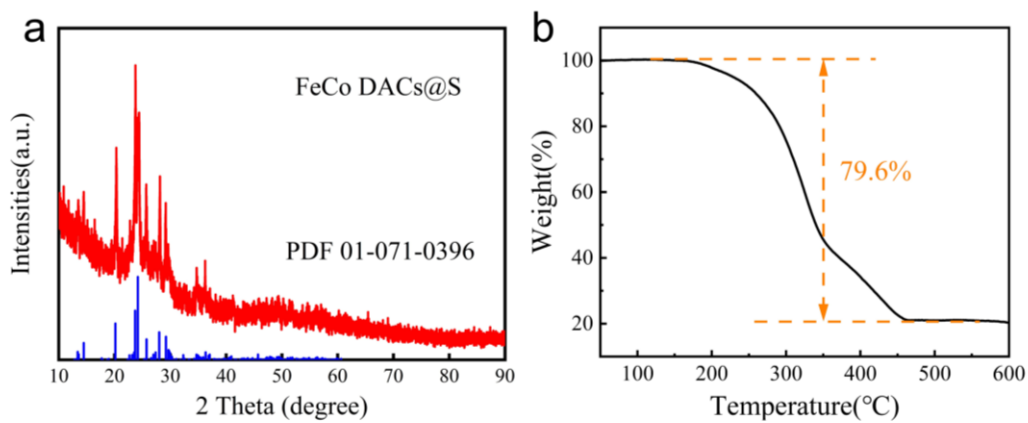

**Supplementary Fig. 9** (a) XRD patterns of Fe-CoDACs/S composites. (b) TGA curve of Fe-CoDACs/S composites.



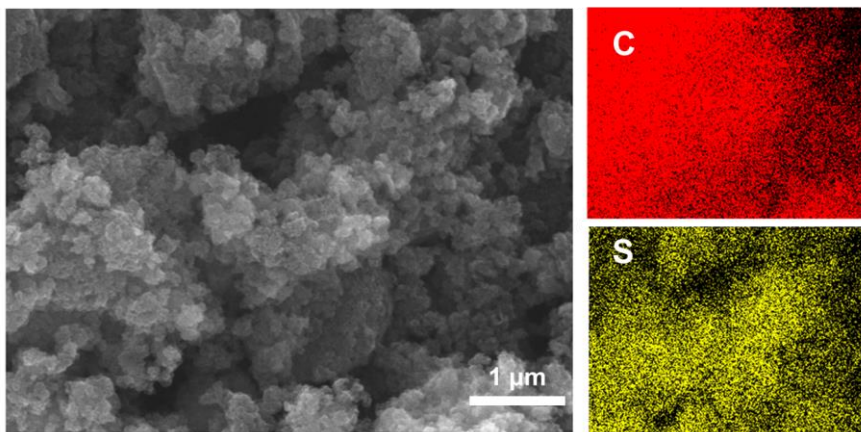

**Supplementary Fig. 10** Elemental mapping images of C and S.

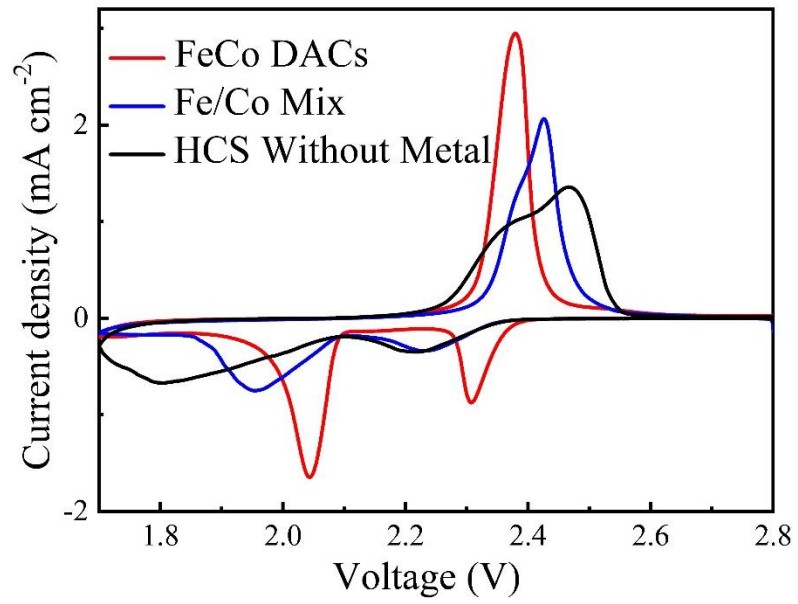

**Supplementary Fig. 11** (a) CV curves different cathodes at  $0.1 \text{ mV s}^{-1}$ . (FeCo DACs/S cathode, Fe/Co mix/S cathode and hollow carbon sphere/S cathode)

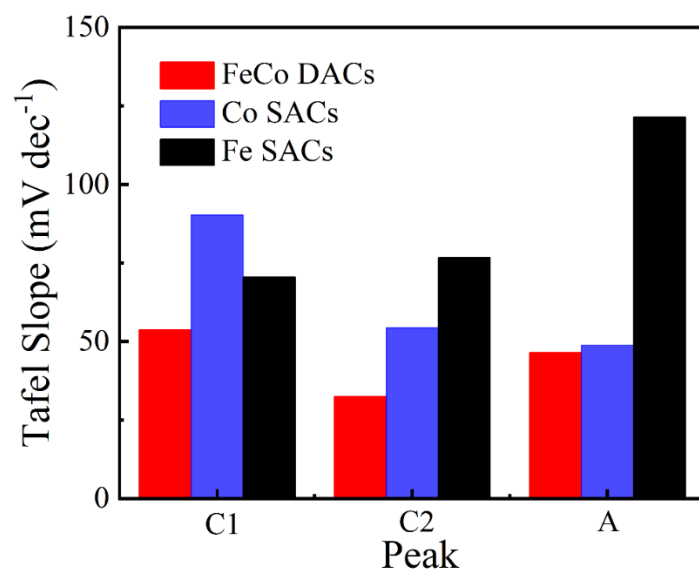

**Supplementary Fig. 12** Statistical plot of Tafel slope of fitted curves.

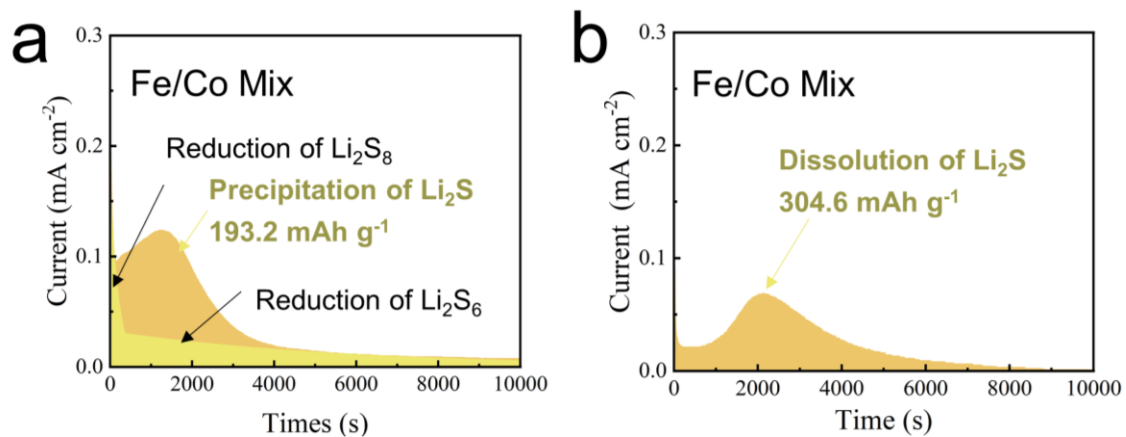

**Supplementary Fig. 13** (a) Potentiostatic nucleation curves of Li<sub>2</sub>S with Fe SACs and Co SACs mixed. (b) The dissolution profiles of Li<sub>2</sub>S.

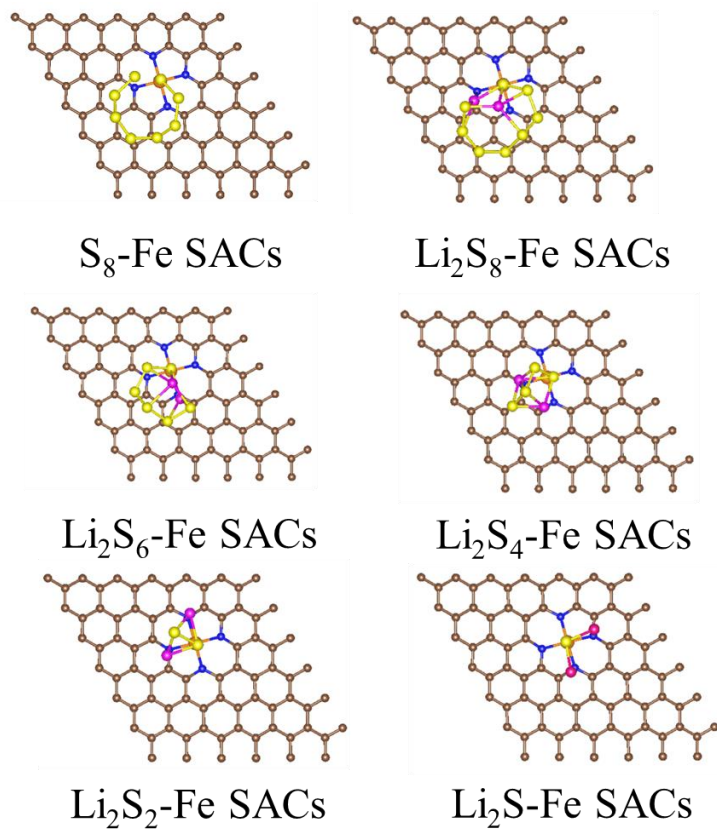

**Supplementary Fig. 14** Optimized configurations of sulfur species anchored on Fe SACs.

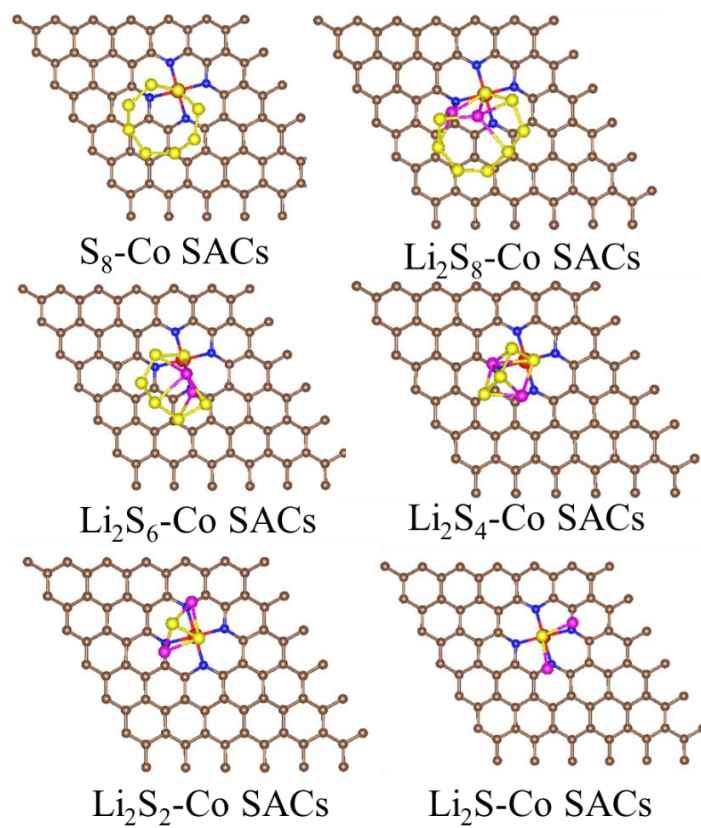

**Supplementary Fig. 15** Optimized configurations of sulfur species anchored on Co SACs.

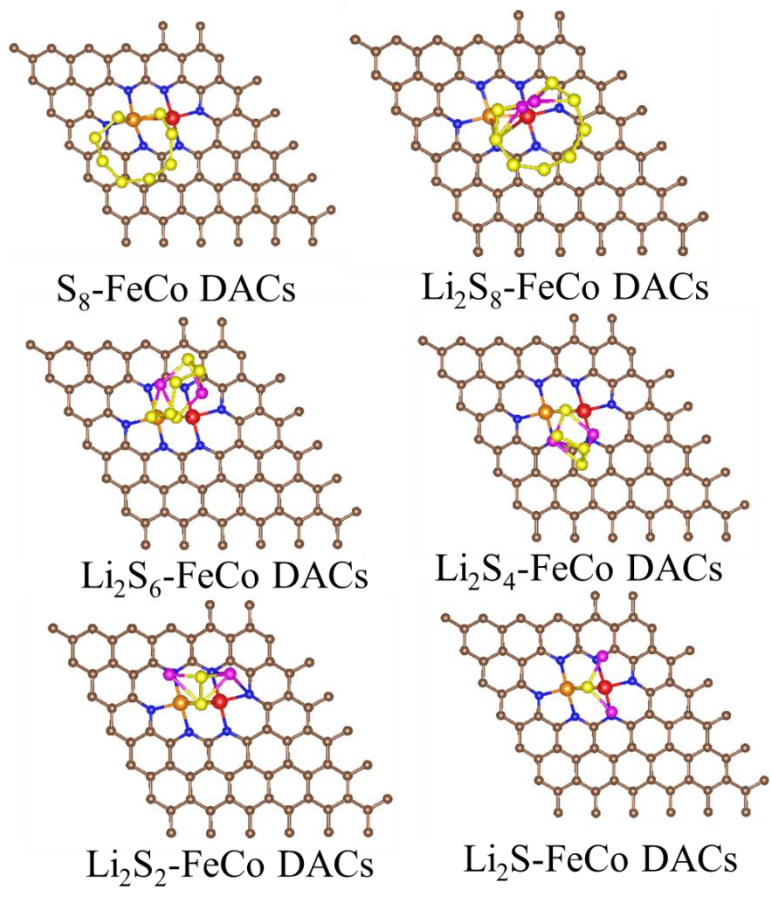

**Supplementary Fig. 16** Optimized configurations of sulfur species anchored on Fe-Co DACs.

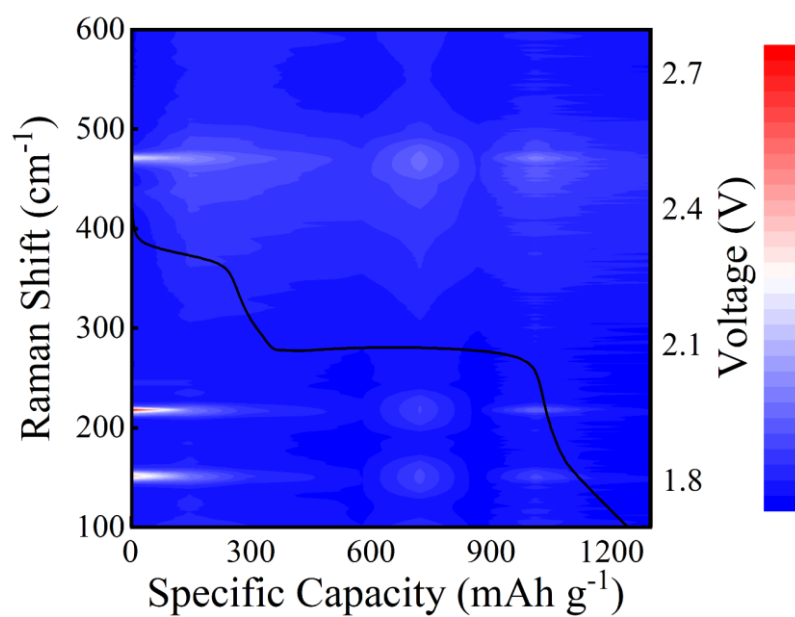

**Supplementary Fig. 17** In situ Raman contour plots and corresponding discharging curve of Fe SACs/S cathode.



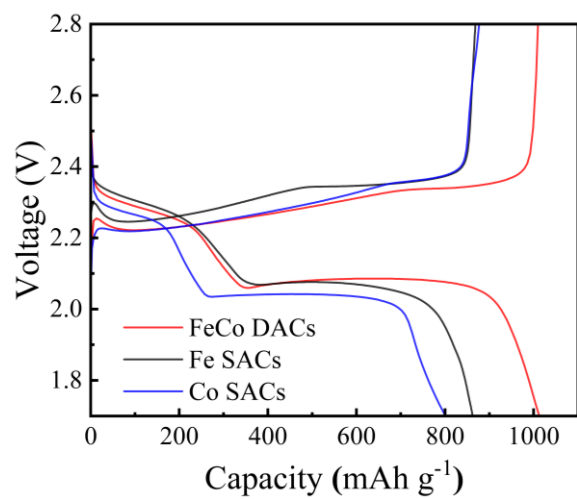

**Supplementary Fig. 18** Galvanostatic charge-discharge curves of different cathodes at 1C.

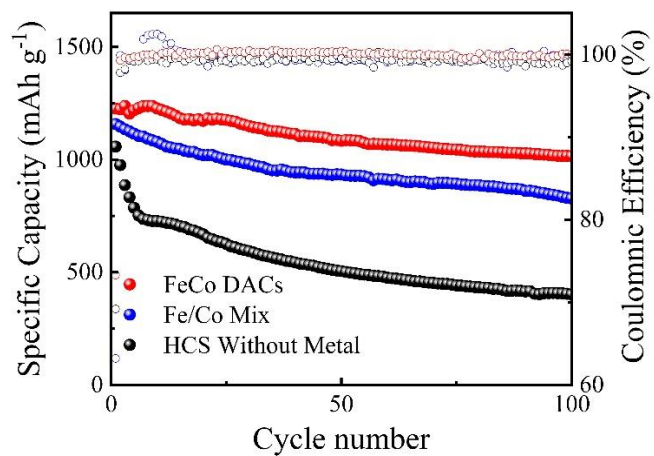

**Supplementary Fig. 19** Cycling performance of different cathodes at 0.2 C.

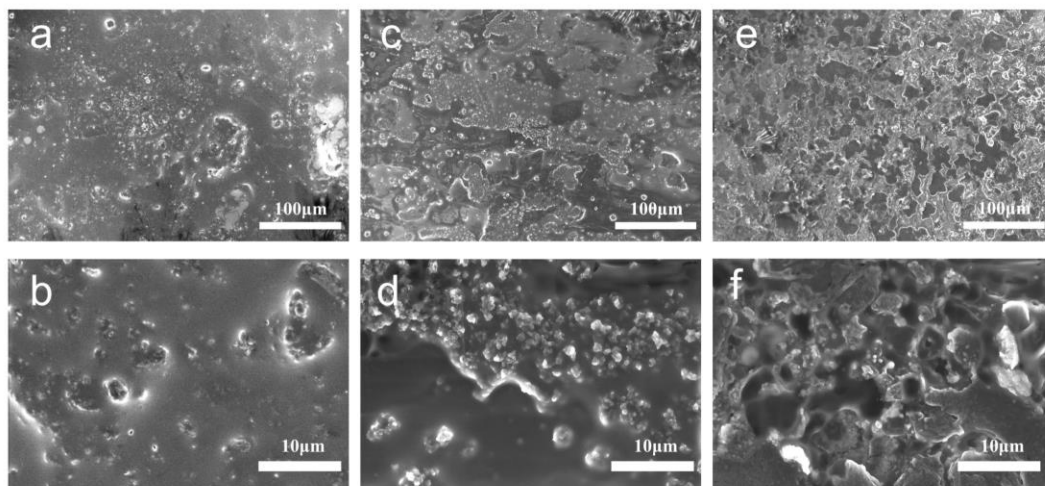

**Supplementary Fig. 20** SEM images of Li anodes after 200 cycles under 1 C with (a-b) FeCo DACs, (c-d) Fe SACs, (e-f) Co SACs.

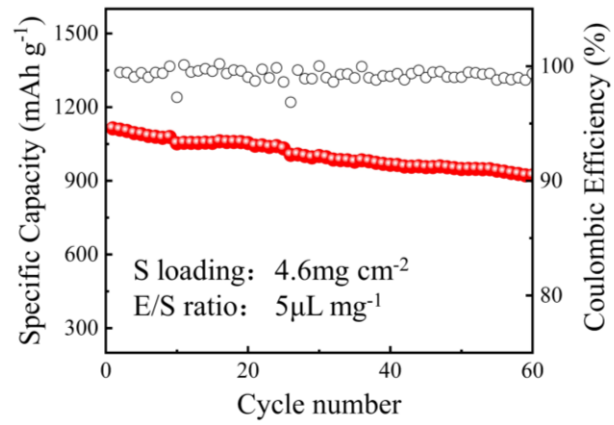

**Supplementary Fig. 21** Cycling performance of FeCo DACs/S cell with lean electrolyte at 0.1 C.

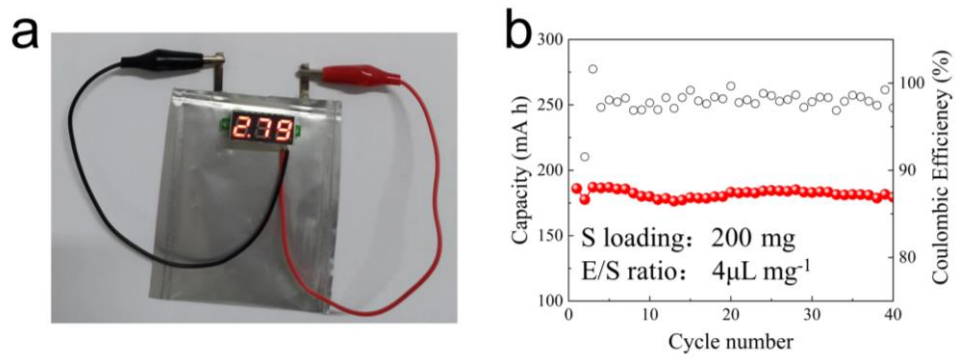

**Supplementary Fig. 22** (a) Photograph of Li-S pouch cell (b) Cycling performance of pouch cell at 0.1C.

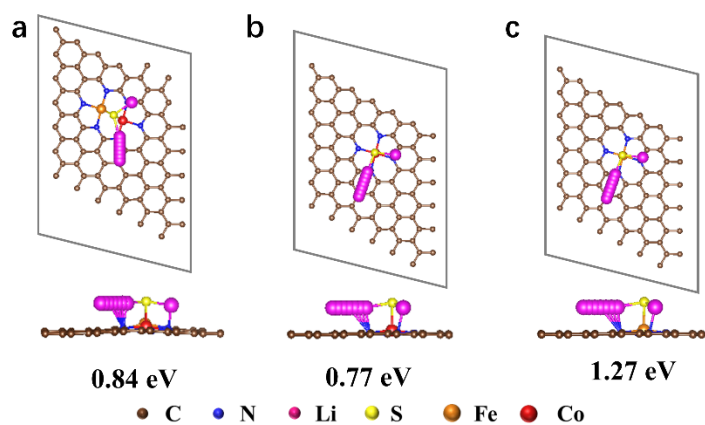

**Supplementary Fig. 23** Detailed decomposition path and decomposition barriers for  $\text{Li}_2\text{S}$  on (a) FeCo DACs, (b) Co SACs and (c) Fe SACs.

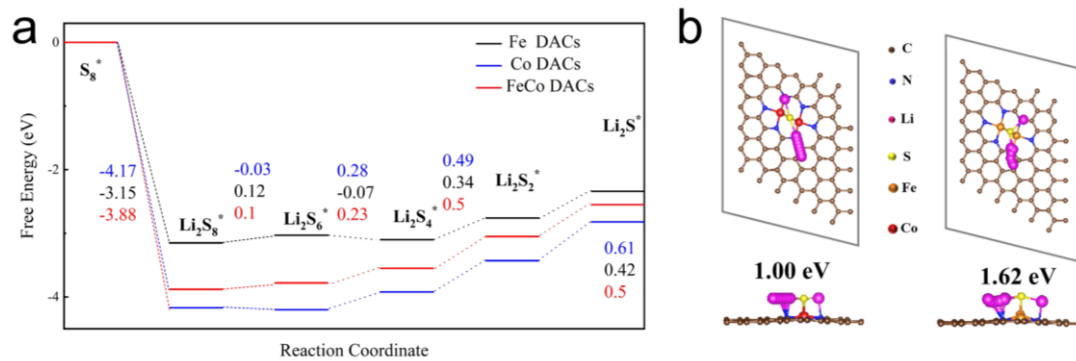

**Supplementary Fig. 24** (a) Gibbs free energy of sulfur reduction process on Fe-Co DACs, Co DACs and Fe DACs. (b) Detailed decomposition path and decomposition barriers for  $Li_2S$  on Co DACs (left) and Fe DACs (right). (Transition states for elementary reaction steps were determined by a combination of the nudged elastic band (NEB) method and the dimer method. The path between the reactant and product is discretized into a series of structural images; The closest transition state structure image was employed as an initial guess structure for the dimer method.)

**Supplementary Table 1.** EXAFS fitting parameters at the Co K-edge for various samples

| Sample                         | Shell        | $CN^a$     | $R(\text{\AA})^b$ | $\sigma^2(\text{\AA}^2)^c$ | $\Delta E_0(\text{eV})^d$ | $R$ factor    |
|--------------------------------|--------------|------------|-------------------|----------------------------|---------------------------|---------------|
| Co foil                        | Co-Co        | 12*        | 2.49±0.01         | 0.0062±0.0002              | 7.2±0.3                   | 0.0007        |
|                                | Co-O         | 5.5        | 1.90±0.03         | 0.0022±0.0011              | 8.7±1.0                   |               |
| Co <sub>3</sub> O <sub>4</sub> | Co-O-Co1     | 6.2        | 2.89±0.01         | 0.0022±0.0015              | 6.9±1.4                   | 0.0088        |
|                                | Co-O-Co2     | 5.4        | 3.31±0.04         | 0.0023±0.0019              | -2.2±1.0                  |               |
| CoPc                           | Co-N         | 4.1        | 1.91±0.04         | 0.0029±0.0009              | 8.1±2.4                   | 0.0049        |
|                                | Co-Co        | 3.6        | 3.07±0.02         | 0.0078±0.0031              | -9.6±1.9                  |               |
| Co sample                      | <b>Co-N1</b> | <b>2.0</b> | <b>1.88±0.02</b>  | <b>0.0032±0.0010</b>       | <b>-8.2±2.5</b>           | <b>0.0106</b> |
|                                | <b>Co-N2</b> | <b>1.1</b> | <b>2.03±0.02</b>  | <b>0.0064±0.0012</b>       | <b>7.7±2.0</b>            |               |
|                                | <b>Co-Fe</b> | <b>0.8</b> | <b>2.55±0.01</b>  | <b>0.0086±0.0065</b>       | <b>-5.4±1.7</b>           |               |

<sup>a</sup> $CN$ , coordination number; <sup>b</sup> $R$ , distance between absorber and backscatter atoms; <sup>c</sup> $\sigma^2$ , Debye-Waller factor to account for both thermal and structural disorders; <sup>d</sup> $\Delta E_0$ , inner potential correction;  $R$  factor indicates the goodness of the fit.  $S_0^2$  was fixed to 0.73, according to the experimental EXAFS fit of Fe foil by fixing  $CN$  as the known crystallographic value. A reasonable range of EXAFS fitting parameters:  $0.700 < S_0^2 < 1.000$ ;  $CN > 0$ ;  $\sigma^2 > 0 \text{ \AA}^2$ ;  $|\Delta E_0| < 10 \text{ eV}$ ;  $R \text{ factor} < 0.02$ .



**Supplementary Table 2.** EXAFS fitting parameters at the Fe K-edge for various samples

| Sample                         | Shell        | $CN^a$     | $R(\text{\AA})^b$ | $\sigma^2(\text{\AA}^2)^c$ | $\Delta E_0(\text{eV})^d$ | $R$ factor    |
|--------------------------------|--------------|------------|-------------------|----------------------------|---------------------------|---------------|
| Fe foil                        | Fe-Fe1       | 8*         | 2.47±0.07         | 0.0047±0.0013              | 5.4±1.7                   | 0.0016        |
|                                | Fe-Fe2       | 6*         | 2.84±0.09         | 0.0051±0.0022              | 3.5±3.0                   |               |
| Fe <sub>2</sub> O <sub>3</sub> | Fe-O         | 6.1        | 1.98±0.03         | 0.0075±0.0022              | 7.2±1.7                   | 0.0067        |
|                                | Fe-O-Fe1     | 6.7        | 2.98±0.01         | 0.0067±0.0013              | 8.5±1.5                   |               |
|                                | Fe-O-Fe2     | 4.3        | 3.65±0.01         | 0.0017±0.0005              | 2.6±1.6                   |               |
| FePc                           | Fe-N         | 4.2        | 1.95±0.01         | 0.0060±0.0040              | 5.7±2.0                   | 0.0127        |
|                                | Fe-Fe        | 4.0        | 3.09±0.04         | 0.0076±0.0069              | 7.2±1.8                   |               |
| <b>Fe sample</b>               | <b>Fe-N1</b> | <b>2.1</b> | <b>1.98±0.01</b>  | <b>0.0039±0.0014</b>       | <b>7.3±2.5</b>            | <b>0.0101</b> |
|                                | <b>Fe-N2</b> | <b>1.0</b> | <b>2.06±0.02</b>  | <b>0.0027±0.0020</b>       | <b>8.4±2.2</b>            |               |
|                                | <b>Fe-Co</b> | <b>0.7</b> | <b>2.51±0.04</b>  | <b>0.0054±0.0031</b>       | <b>6.9±1.4</b>            |               |

<sup>a</sup> $CN$ , coordination number; <sup>b</sup> $R$ , distance between absorber and backscatter atoms; <sup>c</sup> $\sigma^2$ , Debye-Waller factor to account for both thermal and structural disorders; <sup>d</sup> $\Delta E_0$ , inner potential correction;  $R$  factor indicates the goodness of the fit.  $S_0^2$  was fixed to 0.75, according to the experimental EXAFS fit of Fe foil by fixing  $CN$  as the known crystallographic value. A reasonable range of EXAFS fitting parameters:  $0.700 < S_0^2 < 1.000$ ;  $CN > 0$ ;  $\sigma^2 > 0 \text{ \AA}^2$ ;  $|\Delta E_0| < 10 \text{ eV}$ ;  $R$  factor  $< 0.02$ .

**Supplementary Table 3.** EXAFS data fitting results of Fe-Fe.

| Sample             | Shell        | $CN^a$     | $R(\text{\AA})^b$ | $\sigma^2(\text{\AA}^2)^c$ | $\Delta E_0(\text{eV})^d$ | R factor      |
|--------------------|--------------|------------|-------------------|----------------------------|---------------------------|---------------|
| <b>Fe sample-1</b> | <b>Fe-N1</b> | <b>2.1</b> | <b>1.98</b>       | <b>0.0041</b>              | <b>7.5</b>                | <b>0.0125</b> |
|                    | <b>Fe-N2</b> | <b>1.0</b> | <b>2.06</b>       | <b>0.0025</b>              | <b>8.5</b>                |               |
|                    | <b>Fe-Fe</b> | <b>0.7</b> | <b>2.50</b>       | <b>0.0068</b>              | <b>8.1</b>                |               |

**Supplementary Table 4.** EXAFS data fitting results of Co-Co.

| Sample             | Shell        | $CN^a$     | $R(\text{\AA})^b$ | $\sigma^2(\text{\AA}^2)^c$ | $\Delta E_0(\text{eV})^d$ | R factor      |
|--------------------|--------------|------------|-------------------|----------------------------|---------------------------|---------------|
| <b>Co sample-1</b> | <b>Co-N1</b> | <b>2.0</b> | <b>1.88</b>       | <b>0.0031</b>              | <b>-8.1</b>               | <b>0.0122</b> |
|                    | <b>Co-N2</b> | <b>1.1</b> | <b>2.03</b>       | <b>0.0063</b>              | <b>7.6</b>                |               |
|                    | <b>Co-Co</b> | <b>0.8</b> | <b>2.57</b>       | <b>0.0071</b>              | <b>-6.1</b>               |               |

**Supplementary Table 5.** Elemental composition for the catalysts (ICP).

| <b>Sample</b>    | <b>Iron (wt.%)</b> | <b>Cobalt (wt.%)</b> |
|------------------|--------------------|----------------------|
| <b>Fe SACs</b>   | 2.13               | /                    |
| <b>Co SACs</b>   | /                  | 2.15                 |
| <b>FeCo DACs</b> | 1.08               | 1.03                 |
